# Supplementary material for: Leaf area index identified as a major source of variability in modeled CO 2 fertilization
Source: Copernicus journal article supplement (doi:10.5194/bg-15-6909-2018), 2018-11-19
Supplement: Supplementary file [file bg-15-6909-2018-supplement-title-page.pdf › bg-15-6909-2018-supplement-title-page.pdf]

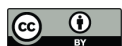

## *Supplement of*

# **Leaf area index identified as a major source of variability in modeled CO<sub>2</sub> fertilization**

**Qianyu Li et al.**

*Correspondence to:* Yiqi Luo (luoyiqi@mail.tsinghua.edu.cn)

- bg-15-6909-2018-supplement-title-page.pdf
- supplementary materials and figures
  - Figure S1.tif
  - Figure S2.tif
  - Figure S3.tif
  - Figure S4.tif
  - Figure S5.tif
  - Figure S6.tif
  - Figure S7.tif
  - Figure S8.tif
  - Figure S9.tif
  - Supplementary materials\_BG\_1029.docx
  - Supplementary materials\_BG\_1029.pdf

The copyright of individual parts of the supplement might differ from the CC BY 4.0 License.
